# Supplementary material for: Exosomes derived from pancreatic cancer cells induce insulin resistance in C2C12 myotube cells through the PI3K/Akt/FoxO1 pathway
Source: PubMed Central journal article supplement (PMC5511275; doi:10.1038/s41598-017-05541-4), 2017-07-14
Supplement: 41598_2017_5541_MOESM1_ESM.pdf [file 41598_2017_5541_MOESM1_ESM.pdf]

## Supplementary

### Title

Exosomes derived from pancreatic cancer cells induce insulin resistance  
in C2C12 myotube cells through the PI3K/Akt/FoxO1 pathway

Lantian Wang<sup>1,2\*</sup>, Bo Zhang<sup>1,2\*</sup>, Wen Zheng<sup>1,2\*</sup>, Muxing Kang<sup>1,2</sup>, Qing Chen<sup>1,2</sup>, Wenjie Qin<sup>1,2</sup>, Chao Li<sup>1,2</sup>, Yuefeng Zhang<sup>1,2</sup>, Yingkuan Shao<sup>2</sup>, Yulian Wu<sup>1,2</sup>

1 Department of Surgery, The Second Affiliated Hospital, Zhejiang University School of Medicine, Hangzhou, P. R. China

2 Key Laboratory of Cancer Prevention and Intervention, China National Ministry of Education, Cancer Institute, Second Affiliated Hospital, Zhejiang University School of Medicine, Hangzhou, Zhejiang, P. R. China

\* These authors have contributed equally to this work

Correspondence to: Yulian Wu, M.D., Ph. D. Department of Surgery, Second Affiliated Hospital, Zhejiang University School of Medicine, 88 Jiefang Road, Hangzhou, 310009, China.

Tel.: +86 571 87784604      fax: +86 571 87784604

E-mail: [wuyulian@medmail.com.cn](mailto:wuyulian@medmail.com.cn)

**Figure S1. Identification of KPC-exosomes and MPDC-exosomes.**

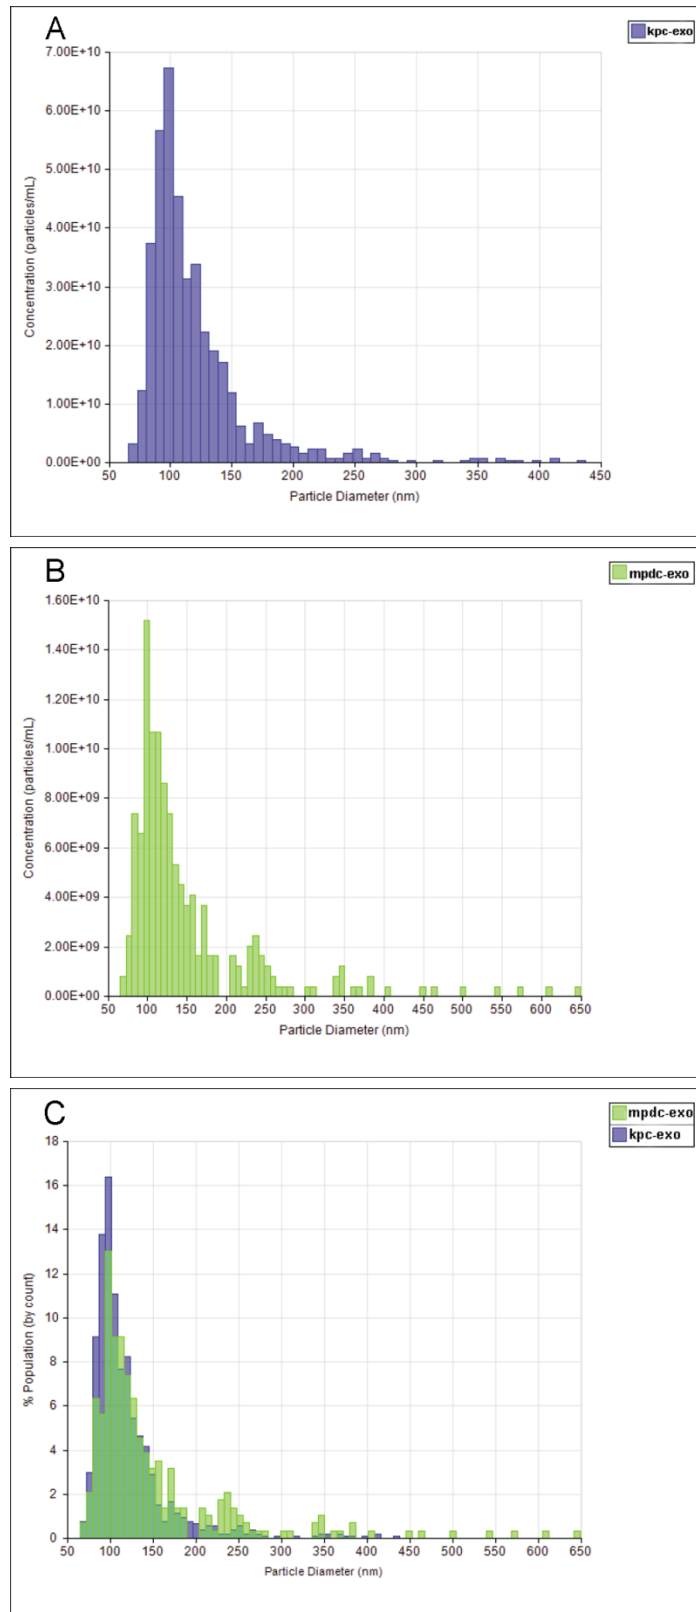

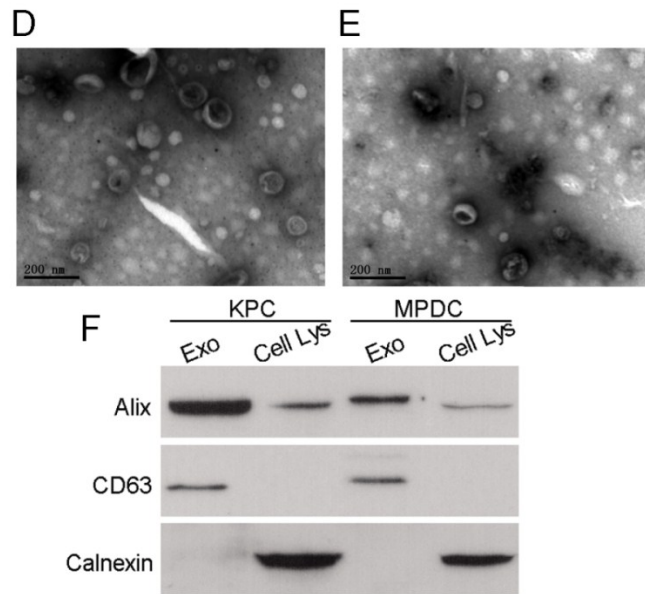

(A-C) Analysis of concentration and size distribution of exosomes by q-Nano particle analyzer. (D&E) Electron microscopy of exosomes. Scale bar, 200nm. (F) Western blot for exosomes protein marker (Alix, CD63). Calnexin used as a negative control.

**Figure S2. The differentiation process of C2C12 myoblasts.**

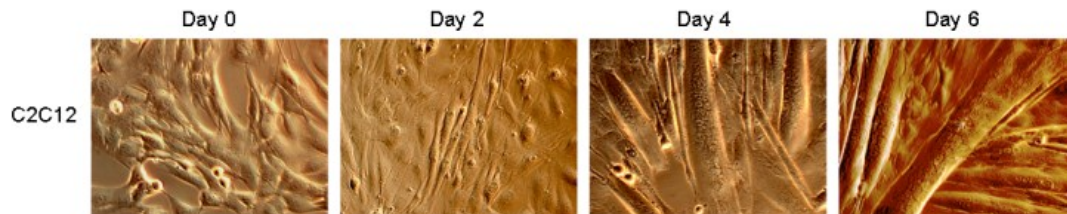

When the medium was replaced by differentiation medium, the morphological characterization of C2C12 myoblasts began to change. On the 1st Day, cells were fusiform or irregular triangle, with 80% cell fusion. On the 2nd day, cells were plurinuclear and still fibroblast-like. On the 4th Day, the formation of multinucleated myotubes formed. On the 6th day, mature C2C12 myotube cells were distinct. Images were captured at 40× magnification.

**Figure S3. The effect of KPC-microvesicles on the insulin and PI3K/Akt signalling pathways.**

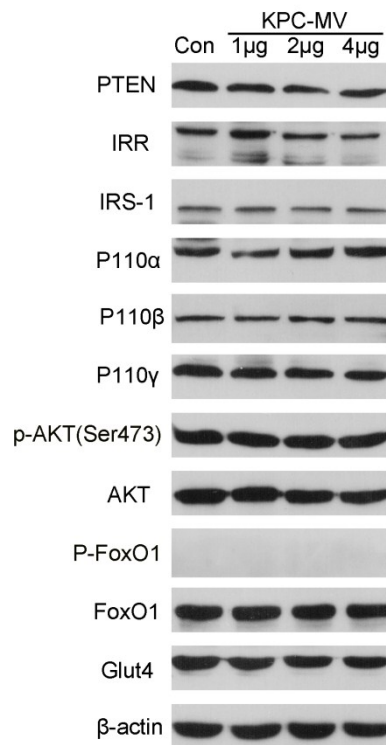

Differentiated C2C12 cells were cultured in 25-cm<sup>2</sup> culture-flasks with 5ml DMEM medium, and treated by KPC-microvesicles (1 $\mu$ g, 2 $\mu$ g, 4 $\mu$ g) for 24h.

**Figure S4. Gene ontology analysis of the significant predicted genes of differently expressed miRNAs.**

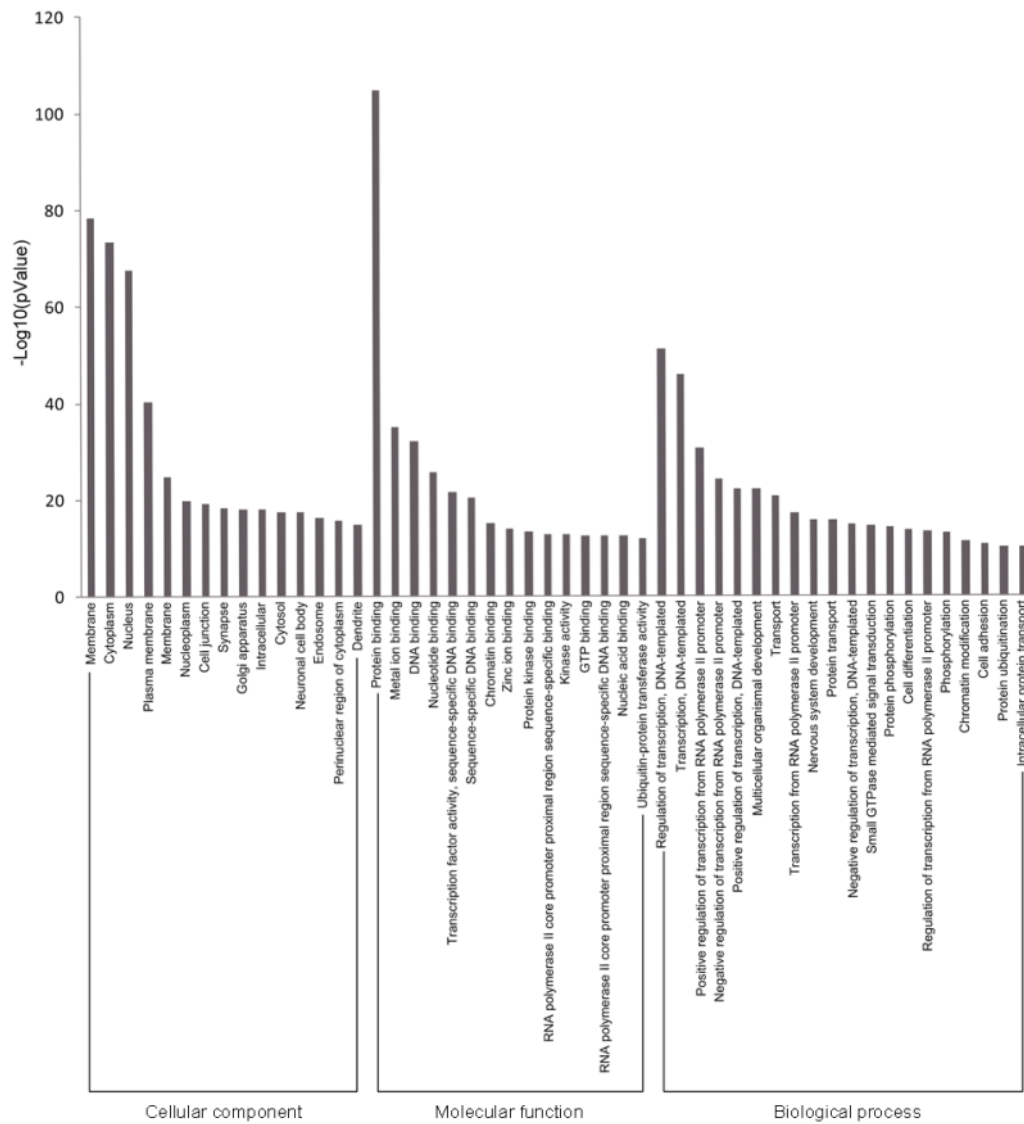

The results were classified into three main categories: cellular component, molecular function and biological process. The vertical axis indicated the significance of genes expression in each category. The horizontal axis showed the genes enrichment according to GO analysis.

**Figure S5. Network among the PI3K/Akt, FoxO and insulin signalling pathways -related miRNAs and predicted genes.**

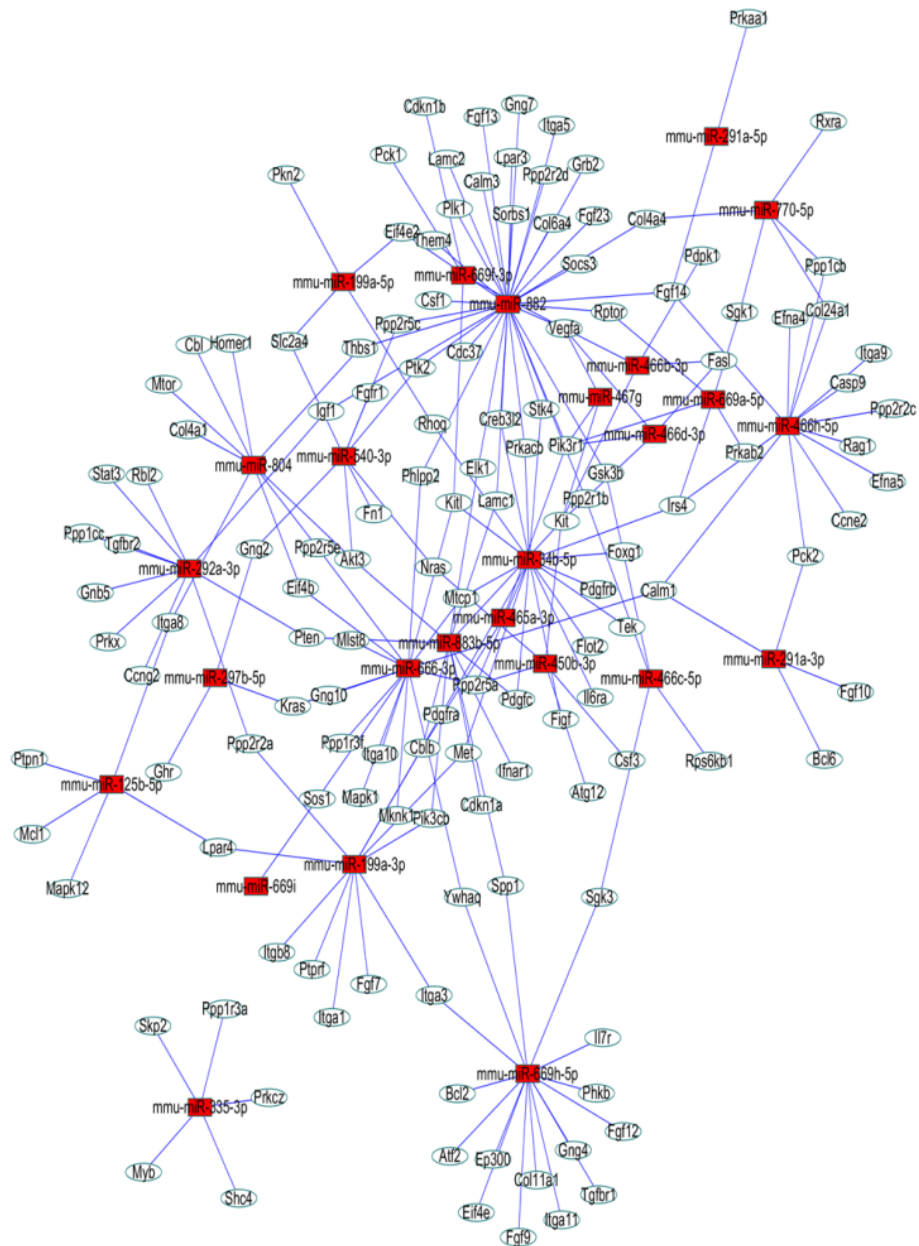

Squares represent miRNAs; Circles represent potential target genes; Straight lines represent possible relationship between miRNAs and predicted genes belonged to the 3 signalling pathways.

**Figure S6. The autophagy induced by KPC-exosomes and insulin.**

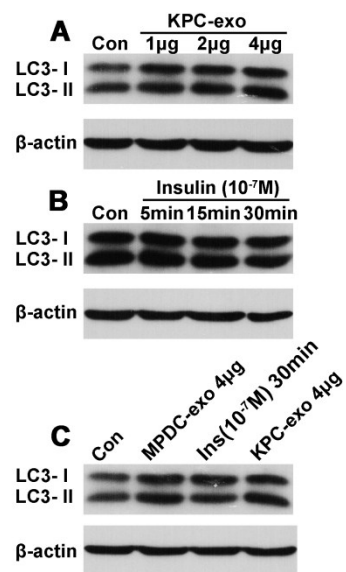

Though the expression of total amount of LC3 showed visible difference, the ratio of LC3II/I (LC3 II/LC3 I) showed no apparent difference in all the 3 groups (A,B,C).

**Table 1. The primer sequences of miRNAs and U6.**

|                    | <b>Primer</b>   | <b>Sequences(5'-3')</b>          |
|--------------------|-----------------|----------------------------------|
| Highly expressed   | mmu-miR-883b-5p | ACACTCCAGCTGGGTACTGAGAATGGGTAG   |
|                    | mmu-miR-666-3p  | ACACTCCAGCTGGGGGCTGCAGCGTGATCG   |
|                    | mmu-miR-770-5p  | ACACTCCAGCTGGGAGCACCACGTGTCTGG   |
|                    | mmu-mir-804     | ACACTCCAGCTGGGTGTGAGTTGTTCCCTCA  |
|                    | mmu-miR-540-3p  | ACACTCCAGCTGGGAGGTCAGAGGTCTGA    |
|                    | mmu-miR-882     | ACACTCCAGCTGGGAGGAGAGAGTTAGCGC   |
|                    | mmu-miR-125b-5p | ACACTCCAGCTGGGTCCCTGAGACCCTAAC   |
|                    | mmu-miR-450b-3p | ACACTCCAGCTGGGATTGGGAACATTTTGC   |
|                    | mmu-miR-151-3p  | ACACTCCAGCTGGGCTAGACTGAGGCTCC    |
| Lowly expressed    | mmu-miR-466b-3p | ACACTCCAGCTGGGATACATACACGCACAC   |
|                    | mmu-miR-669h-5p | ACACTCCAGCTGGGATGCATGGGTGTATAGTT |
|                    | mmu-miR-199a-3p | ACACTCCAGCTGGGACAGTAGTCTGCACAT   |
|                    | mmu-miR-466c-5p | ACACTCCAGCTGGGTGATGTGTGTGTGCATGT |
|                    | mmu-miR-466d-3p | ACACTCCAGCTGGGTATACATACACGCAC    |
|                    | mmu-miR-292a-3p | ACACTCCAGCTGGGAAAGTGCCGCCAGGTTTT |
|                    | mmu-miR-291a-5p | ACACTCCAGCTGGGCATCAAAGTGGAGGCC   |
|                    | mmu-miR-669a-5p | ACACTCCAGCTGGGAGTTGTGTGTGCATGTTT |
|                    | mmu-miR-34b-5p  | ACACTCCAGCTGGGAGGCAGTGTAATTAGCT  |
| endogenous control | U6-F            | CTCGCTTCGGCAGCACA                |
|                    | U6-R            | AACGCTTCACGAATTTGCGT             |
